# Supplementary material for: Comparative metabolomic analysis reveals the variations in taxoids and flavonoids among three Taxus species
Source: PubMed Central journal article supplement (PMC6884900; doi:10.1186/s12870-019-2146-7), 2019-11-29
Supplement: 12870_2019_2146_MOESM2_ESM.pdf [file 12870_2019_2146_MOESM2_ESM.pdf]

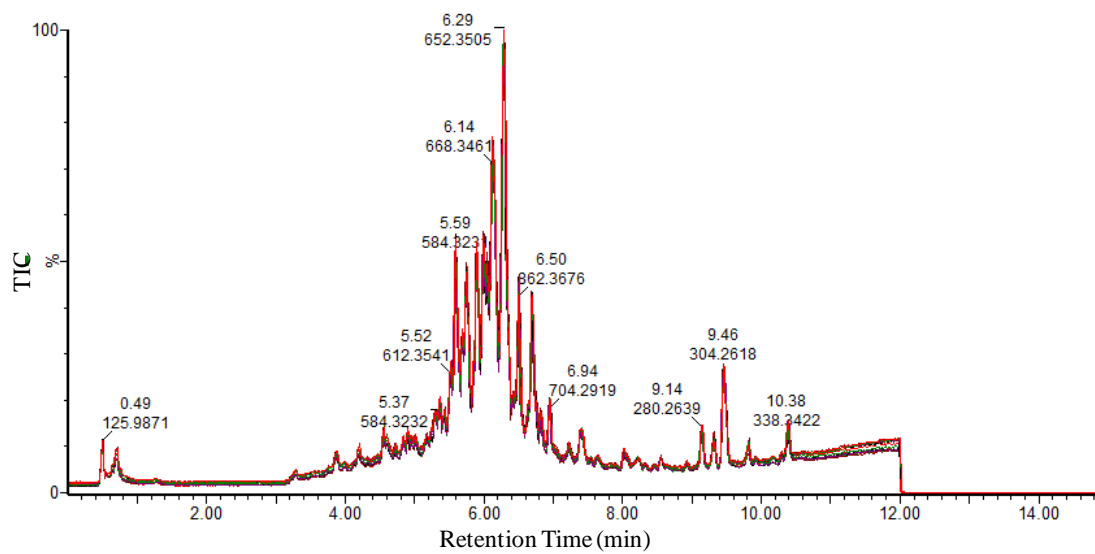

Figure S1 The total ion chromatograms of all the samples.
