# Supplementary material for: Comparative metabolomic analysis reveals the variations in taxoids and flavonoids among three Taxus species
Source: PubMed Central journal article supplement (PMC6884900; doi:10.1186/s12870-019-2146-7), 2019-11-29
Supplement: 12870_2019_2146_MOESM6_ESM.pdf [file 12870_2019_2146_MOESM6_ESM.pdf]

*T. media* vs *T. cuspidata*

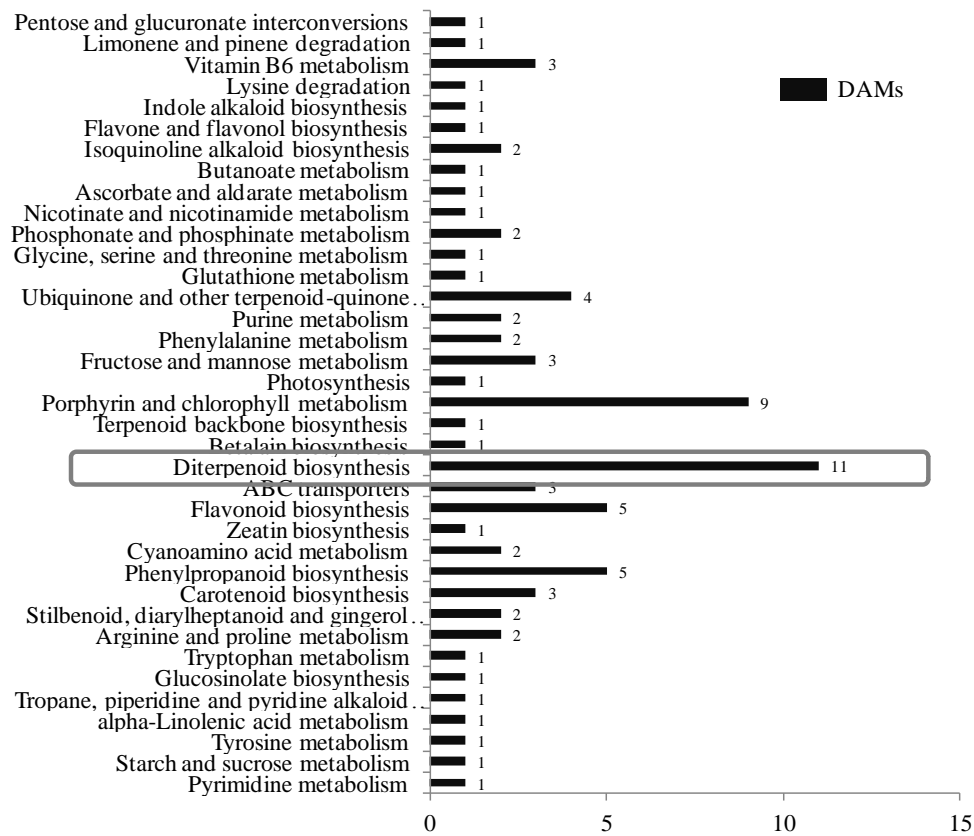

Figure S4 Identification of DAMs in the *T. media* and *T. cuspidata* comparison. The box indicated the 'diterpenoid biosynthesis' pathway.
