# Supplementary material for: Comparative metabolomic analysis reveals the variations in taxoids and flavonoids among three Taxus species
Source: PubMed Central journal article supplement (PMC6884900; doi:10.1186/s12870-019-2146-7), 2019-11-29
Supplement: 12870_2019_2146_MOESM8_ESM.pdf [file 12870_2019_2146_MOESM8_ESM.pdf]

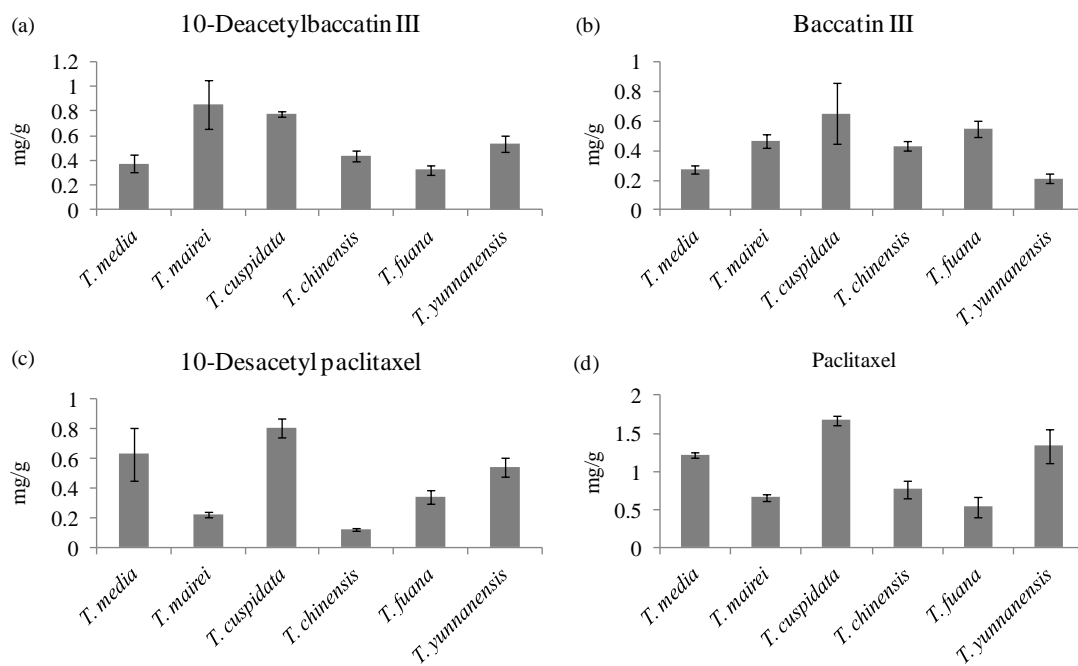

Figure S6 **A more exhaustive profile of taxoids in the *Taxus* genus.** The contents of three intermediates, including 10-DAB III (a), baccatin III (b), , and 10-DAP (c), and paclitaxel (d) were quantified by HPLC-MS/MS method.
